# Supplementary material for: Preparation of arsenic(iii) monoclonal antibodies and preliminary evaluation of a novel silver-coated gold nanorod SERS immunoassay strip construction
Source: Royal Society of Chemistry journal article supplement (doi:10.1039/d3ay01205k), 2023-01-01
Supplement: d3ay01205k1.pdf [file d3ay01205k1.pdf]

**Table S1.** Operation flow of cell fusion with mouse spleen cells and myeloma SP2/0 cells

| Time    | Operation                                                                                                                                                                                  |
|---------|--------------------------------------------------------------------------------------------------------------------------------------------------------------------------------------------|
| 0-1 min | Add 1 mL PEG1500 drop by drop, first slow then fast, make sure it doesn't stick to the wall and drop on the bottom cell, shake it in a circle while adding, and don't produce air bubbles. |
| 1-2 min | Gently shake the centrifuge tube, do not produce air bubbles.                                                                                                                              |
| 2-3 min | Add 0.5 mL incomplete medium drop by drop, shake gently                                                                                                                                    |
| 3-4 min | Add 1 mL incomplete medium drop by drop, shake gently                                                                                                                                      |
| 4-5 min | Add 2 mL incomplete medium drop by drop, shake gently                                                                                                                                      |
| 5-6 min | Add 3 mL incomplete medium drop by drop, shake gently                                                                                                                                      |
| 6-7 min | Add 4 mL incomplete medium drop by drop, shake gently                                                                                                                                      |
| 7-8 min | Add incomplete culture medium to 20 mL                                                                                                                                                     |

**Table S2.** Synthesis state of arsenic ion complete antigen

| Label                            | Concentration ( mg/mL ) | Application           |
|----------------------------------|-------------------------|-----------------------|
| As <sup>3+</sup> -ITCBE-BSA-10   | 6.85                    | Mouse immunity        |
| As <sup>3+</sup> -ITCBE-BSA-20   | 2.88                    | Mouse immunity        |
| As <sup>3+</sup> -ITCBE-BSA-30   | 1.96                    | Mouse immunity        |
| ITCBE-KLH-As <sup>3+</sup> -1000 | 4.89                    | Mouse immunity        |
| ITCBE-KLH-As <sup>3+</sup> -2000 | 2.50                    | Mouse immunity        |
| As <sup>3+</sup> -ITCBE-OVA-10   | 6.36                    | ELISA coating antigen |
| As <sup>3+</sup> -ITCBE-OVA-20   | 3.81                    | ELISA coating antigen |
| As <sup>3+</sup> -ITCBE-OVA-30   | 2.54                    | ELISA coating antigen |
